# Supplementary material
Source: PubMed Central journal article supplement (PMC4313157)
Supplement: JCM.01195-14_zjm999093687so1.pdf [file JCM.01195-14_zjm999093687so1.pdf]

Table S1: Details on oligonucleotide sequences, orientation and binding site to the BoAstV-CH13 genome.

| Oligonucleotide          | Sequence                                                             | Orientation | Binding site | Application                       |
|--------------------------|----------------------------------------------------------------------|-------------|--------------|-----------------------------------|
| BAstV_qR                 | 5'-ACA ACC TCC TTG GCA ATC TG-3'                                     | -           | 4223-4204    | Reverse transcription             |
| BAstV_qL_PstI            | 5'-GCT AGT CTG CAG TTT TGG CTC GTC ACT TTG TG-3'                     | +           | 4059-4076    | Cloning ISH Probe A               |
| BAstV_qR_EcoRI           | 5'-AAG CTC GAA TTC ACA ACC TCC TTG GCA ATC TG-3'                     | -           | 4223-4204    | Cloning ISH Probe A               |
| BAV_3_PstI               | 5'-GCT AGT CTG CAG ACC GCC TTT CCG ATG ATG TAC-5'                    | +           | 4951-4972    | Cloning ISH Probe B               |
| BAV_4_EcoRI              | 5'-AAG CTC GAA TTC ATC AAC AAC CTG CCA TAT-3'                        | -           | 5123-5103    | Cloning ISH Probe B               |
| BAV-3                    | 5'-ACC GCC TTT CCG ATG ATG TGC                                       | +           | 4952-4972    | Cloning for sequencing            |
| BAstV_Orf2_R_new         | 5'-CTC GGC GTG GCC TCG G-3'                                          | -           | 6438-6423    | Cloning for sequencing            |
| MA 4                     | 5'-TGG ACC CGC TAT GAT GGC ACI AT-3'                                 | +           | 3378-3400    | Cloning for<br>Sequencing, RT-PCR |
| MA 2                     | 5'-GGC TTT ACC CAC ATI CCA AA-3'                                     | -           | 3805-3786    | RT-PCR                            |
| BAV_4                    | 5'-TTC ATC AAC AAC CTG CCA TAT-3'                                    | -           | 5124-5104    | Cloning for sequencing            |
| BAV 9-4 fo               | 5'-TGA CAT TGA TGC TGA GTG G-3'                                      | +           | 2229-2247    | Cloning for sequencing            |
| BAV 10-4 do              | 5'-CCG ATG TTG TTC AGT AAC TTC-3'                                    | -           | 3560-3540    | Cloning for sequencing            |
| BAV 11-5 fo              | 5'-CTG GTC TGT TTC TTA ATG ATG C-3'                                  | +           | 1046-1067    | Cloning for sequencing            |
| BAV 12-5 do              | 5'-GGT ATT GAC AAG TTC CTC AGA-3'                                    | -           | 2313-2293    | Cloning for sequencing            |
| BAV 13-6 fo              | 5'-GTC CAA GAA TGG CTC TTT CA-3'                                     | +           | 44-63        | Cloning for sequencing            |
| BAV 14-6 do              | 5'-TGT GCT TTC ACC ATT ATA GCA-3'                                    | -           | 1094-1074    | Cloning for sequencing            |
| BAstV_Orf2_R             | 5'-ATG ATC ACT GAA GTA AAC AAA TCC-3'                                | -           | 6481-6456    | Reverse transcription             |
| Gene Racer Oligo<br>d(T) | 5'-<br>GCTGTCAACGATACGCTACGTAACGGCATGACAGTG(T) <sub>24</sub> -<br>3' | -           | PolyA-tail   | 3'RACE                            |
| Gene Racer 3'            | 5'-GCT GTC AAC GAT ACG CTA CGT AAC G-3'                              | -           | -            | 3'RACE                            |
| BAV_5                    | 5'- ATG AGG GCG TGC GTG GTG TTC-3'                                   | +           | 6359-6379    | 3'RACE                            |
| 5'RACE AAP               | 5'- GGC CAC GCG TCG ACT AGT ACG GGI IGG GII GGG<br>IIG-3'            | +           | -            | 5'RACE                            |
| BAV 20                   | 5'- ACT CGT TCC CAG CAA CTA CAC                                      | -           | 313-293      | 5'RACE                            |
| 5'RACE AUAP              | 5'- GGC CAC GCG TCG ACT AGT AC-3'                                    | +           | -            | 5'RACE nested PCR                 |
| BAV 16                   | 5'- ATC GCC GGT GGG GTC AAT CA-3'                                    | -           | 252-233      | 5'RACE nested PCR                 |

Table S2: Results of the bioinformatics pipeline for viral protein identification applied to NGS data of three cows with non-suppurative encephalitis of unknown etiology.

| Case ID | Library | Contigs |               | BLASTx hits          |                             |                |                           | Alignment      |             |
|---------|---------|---------|---------------|----------------------|-----------------------------|----------------|---------------------------|----------------|-------------|
|         |         | Total   | Mapped/length | Virus family         | Virus                       | Protein*       | GeneBank Accession Number | Similarity [%] | Length [aa] |
| 42145   | DNA     | 24542   | 1/992         | <i>Retroviridae</i>  | Human betaretrovirus        | Pol            | AFZ15778.1                | 52.94          | 255         |
|         |         |         |               |                      | Mouse mammary tumor virus C | Pol            | P11283.2                  | 53.36          | 253         |
|         |         |         |               |                      | Mouse mammary tumor virus B | Pol            | P03365.2                  | 52.94          | 255         |
| 45641   | RNA     | 7625    | -             | -                    | -                           | -              | -                         | -              | -           |
|         | DNA     | 36176   | 1/1739        | <i>Retroviridae</i>  | Human betaretrovirus        | Pol            | AFZ15778.1                | 51.76          | 255         |
|         |         |         |               |                      | Mouse mammary tumor virus C | Pol            | P11283.2                  | 52.17          | 253         |
| 45664   | RNA     | 4373    | -             | -                    | -                           | -              | -                         | -              | -           |
|         | DNA     | 21367   | -             | -                    | -                           | -              | -                         | -              | -           |
|         | RNA     | 1922    | 1/6540        | <i>Astroviridae</i>  | Astrovirus VA3              | RdRp           | AFV53437.1                | 63.31          | 556         |
|         |         |         |               | Astrovirus_VA3       | Capsid                      | YP_006905860.1 | 59.63                     | 436            |             |
|         |         |         |               | Astrovirus VA3/HMO   | RdRp                        | AGF91827.1     | 65.45                     | 275            |             |
|         |         |         |               | Astrovirus_VA3/HMO   | Capsid                      | AGF91828.1     | 60.49                     | 205            |             |
|         |         |         |               | Astrovirus VA4       | RdRp                        | AFV53440.1     | 65.34                     | 528            |             |
|         |         |         |               | Fox astrovirus       | RdRP                        | AGK45543.1     | 57.65                     | 510            |             |
|         |         |         |               | Fox astrovirus       | Capsid                      | AGK45544.1     | 63.11                     | 412            |             |
|         |         |         |               | Human astrovirus 2   | RdRp                        | AFR23485.1     | 50.2                      | 253            |             |
|         |         |         |               | Human astrovirus 5   | NS1ab                       | Q4TWH8.2       | 50.1                      | 525            |             |
|         |         |         |               | Mink astrovirus 1    | NS1ab                       | Q80KJ7.2       | 59.62                     | 520            |             |
|         |         |         |               | Mink astrovirus 1    | Capsid                      | Q80KJ6.1       | 63.99                     | 386            |             |
|         |         |         |               | Ovine astrovirus 1   | Capsid                      | Q9JH65.1       | 66.58                     | 769            |             |
|         |         |         |               | Ovine astrovirus 1   | NS1a                        | Q9JH67.1       | 55.92                     | 853            |             |
|         |         |         |               | Ovine astrovirus 1   | NS1ab                       | Q9JH66.2       | 69.46                     | 854            |             |
|         |         |         |               | Porcine astrovirus_2 | NS1ab                       | ADO30543.1     | 50.1                      | 523            |             |
|         |         |         |               | Porcine astrovirus_3 | NS1ab                       | AFW16976.1     | 61.93                     | 528            |             |

\*Pol, retrovirus polyprotein; RdRp, RNA dependent RNA polymerase; NS, non-structural proteins

## **Materials and Methods**

**In situ hybridization (ISH).** BoAstV\_CH13 cDNA was amplified by PCR with primers BAstV\_qL\_PstI and BAstV\_qR\_EcoRI for Probe A, and with primers BAV3\_PstI and BAV4\_EcoRI for Probe B (see Table S1 in the supplemental material). The resulting amplicons were cloned into the pSPT\_18 plasmid (Roche) via the PstI and EcoRI restriction sites. Inserted sequences were confirmed by Sanger sequencing, plasmids were linearized with PstI (Probe A) or HindIII (Probe B), and DIG-labeled antisense RNA was transcribed with T7 RNA polymerase. Tissue slides of BoAstV-CH13 positive and negative brain tissues were deparaffinized, rehydrated, incubated in 0.2 M HCl for 20 min, and treated with Proteinase K (5 µg/ml [Roche] in 0.05 M Tris-HCl, 0.15 mM CaCl<sub>2</sub>) to increase target accessibility. Proteinase K was inactivated by 4% (w/v) paraformaldehyde, and the tissues were acetylated with 0.25% (v/v) acetic anhydride. Next, the slides were pre-incubated in hybridization mix (50% [v/v] deionized formamide, 0.05% [w/v] Ficoll, 0.05% [w/v] polyvinylpyrrolidone, 0.05% [w/v] bovine serum albumin [BSA], and 4 × saline-sodium citrate), supplemented with 0.25% (w/v) yeast RNA, for 2 h at 50°C. Probe hybridization was accomplished in hybridization mix supplemented with 0.5% (w/v) yeast RNA, 10% (w/v) dextran sulfate, and ~1 ng/ml of DIG-labeled RNA (Probe A, Probe B, or an unrelated control probe) for ~16 h at 50°C. Excess labeled RNA was removed by intensive washing and RNase treatment for 30 min at 37°C. Finally, binding of DIG-labeled RNA probe was detected with anti-digoxigenin alkaline phosphate conjugated Fab fragments (Roche) and a nitro-blue tetrazolium / 5-bromo-4-chloro-3'-indolyphosphate substrate (Roche).
